# Supplementary material
Source: PubMed Central journal article supplement (PMC6276124)
Supplement: NIHMS996770-supplement-Supplement.pdf [file NIHMS996770-supplement-Supplement.pdf]

**Supplemental Table I. Subject Baseline Characteristics- Between Group Comparisons**

|                        | <b>Overall (N=397)</b> | <b>Usual Care (N=134)</b> | <b>Prevention Consult (N=130)</b> | <b>Prevention Consult + Behavioral Intervention (N=133)</b> | <b>P value</b> |
|------------------------|------------------------|---------------------------|-----------------------------------|-------------------------------------------------------------|----------------|
| <b>Age</b>             | 64.56 (10.76)          | 63.44 (11.28)             | 64.45 (11.05)                     | 65.8 (9.86)                                                 | 0.20           |
| <b>Female sex</b>      | 94 (23.68%)            | 30 (22.39%)               | 28 (21.54%)                       | 36 (27.07%)                                                 | 0.52           |
| <b>Race</b>            |                        |                           |                                   |                                                             | 0.97           |
| White                  | 272 (68.51%)           | 89 (66.42%)               | 91 (70%)                          | 92 (69.17%)                                                 |                |
| Black                  | 56 (14.11%)            | 22 (16.42%)               | 17 (13.08%)                       | 17 (12.78%)                                                 |                |
| Asian                  | 21 (5.29%)             | 8 (5.97%)                 | 6 (4.62%)                         | 7 (5.26%)                                                   |                |
| Other                  | 48 (12.09%)            | 15 (11.19%)               | 16 (12.31%)                       | 17 (12.78%)                                                 |                |
| <b>Ethnicity</b>       |                        |                           |                                   |                                                             | 0.82           |
| Hispanic               | 34 (8.56%)             | 11 (8.21%)                | 10 (7.69%)                        | 13 (9.77%)                                                  |                |
| Non-Hispanic           | 363 (91.44%)           | 123 (91.79%)              | 120 (92.31%)                      | 120 (90.23%)                                                |                |
| <b>BMI</b>             | 29.69 (5.1)            | 30.04 (5.24)              | 29.48 (5.08)                      | 29.54 (5)                                                   | 0.62           |
| <b>Education</b>       |                        |                           |                                   |                                                             | 0.29           |
| ≤High School Education | 161(41.6%)             | 55 (41.98%)               | 46 (36.51%)                       | 60 (46.15%)                                                 |                |
| >High school Education | 226 (58.4%)            | 76 (58.02%)               | 80 (63.49%)                       | 70 (53.85%)                                                 |                |
| <b>Current Smoker</b>  | 51 (12.85%)            | 18 (13.43%)               | 15 (11.54%)                       | 18 (13.53%)                                                 | 0.86           |
| <b>Hypertension</b>    | 315 (79.35%)           | 105 (78.36%)              | 102 (78.46%)                      | 108 (81.2%)                                                 | 0.81           |
| <b>Hyperlipidemia</b>  | 346 (87.15%)           | 115 (85.82%)              | 111 (85.38%)                      | 120 (90.23%)                                                | 0.43           |

|                                   |              |              |              |              |       |
|-----------------------------------|--------------|--------------|--------------|--------------|-------|
| <b>Diabetes</b>                   | 126 (31.74%) | 43 (32.09%)  | 35 (26.92%)  | 48 (36.09%)  | 0.28  |
| <b>Family History</b>             | 168(42.53%)  | 54(40.91%)   | 58(44.62%)   | 56(42.11%)   | 0.83  |
| <b>Prior Angioplasty or Stent</b> | 154 (38.79%) | 53 (39.55%)  | 55 (42.31%)  | 46 (34.59%)  | 0.43  |
| <b>Depression</b>                 | 49 (12.34%)  | 13 (9.7%)    | 17 (13.08%)  | 19 (14.29%)  | 0.50  |
| <b>Stress work/home</b>           |              |              |              |              | 0.68  |
| At least some                     | 286(73.33%)  | 101(75.94%)  | 93(72.66%)   | 92(71.32%)   |       |
| Never                             | 104 (26.67%) | 32 (24.06%)  | 35(27.34%)   | 37(28.68%)   |       |
| <b>Financial stress</b>           |              |              |              |              | 0.81  |
| At least moderate                 | 150(38.66%)  | 51(38.64%)   | 52(40.63%)   | 47(36.72%)   |       |
| Little or None                    | 238(61.34%)  | 81(61.36%)   | 76(59.38%)   | 81(63.28%)   |       |
| <b>Medications at baseline</b>    |              |              |              |              |       |
| Aspirin                           | 319 (80.35%) | 103 (76.87%) | 108 (83.08%) | 108 (81.20%) | 0.43  |
| Clopidogrel                       | 146 (36.78%) | 51 (38.06%)  | 46 (35.38%)  | 49 (36.84%)  | 0.90  |
| Ace-inhibitors                    | 107 (26.95%) | 31 (23.13%)  | 32 (24.62%)  | 44 (33.08%)  | 0.14  |
| Angiotensin-receptor blockers     | 109 (27.46%) | 37 (27.61%)  | 40 (30.77%)  | 32 (24.06%)  | 0.48  |
| Any Statin                        | 279 (70.28%) | 88 (65.67%)  | 92 (70.77%)  | 99 (74.44%)  | 0.29  |
| High-intensity statin             | 103 (25.94%) | 29 (21.64%)  | 33 (25.38%)  | 41 (30.83%)  | 0.23  |
| Ezetimibe                         | 21 (5.29%)   | 7 (5.22%)    | 7 (5.38%)    | 7 (5.26%)    | 0.99  |
| Fish oil                          | 51 (12.85%)  | 9 (6.72%)    | 16 (12.31%)  | 26 (19.55%)  | 0.007 |
| Fibrates                          | 21 (5.29%)   | 4 (2.99%)    | 5 (3.85%)    | 12 (9.02%)   | 0.06  |

|               |              |              |              |              |        |
|---------------|--------------|--------------|--------------|--------------|--------|
| Metformin     | 76 (19.14%)  | 26(19.40%)   | 21(16.15%)   | 29(21.80%)   | 0.51   |
| PCI performed | 376 (94.71%) | 126 (94.03%) | 125 (96.15%) | 125 (93.98%) | 0.6689 |

Family history defined as a first-degree relative with coronary artery disease; male <55 years old and female <65 years old; Ns reflect the number of patients per group assignment at baseline. ACE, angiotensin-converting enzyme; PCI, percutaneous coronary intervention

**Supplemental Table II. Primary and Secondary Endpoints (Risk Factors)- Between Group Comparisons**

| Outcomes                   | Prevention Consult Alone vs Usual Care |         |                                    |         | Prevention Consult + Behavioral Intervention vs Usual Care |         |                                    |         |
|----------------------------|----------------------------------------|---------|------------------------------------|---------|------------------------------------------------------------|---------|------------------------------------|---------|
|                            | Unadjusted difference between groups   | P value | Adjusted difference between groups | P value | Unadjusted difference between groups                       | P value | Adjusted difference between groups | P value |
| Δ Non-HDL-C (mg/dl)        | -5.6 (-16.0, 4.9)                      | 0.29    | -5.2(-13.92,3.51)                  | 0.24    | 1.5 (-9.01,11.9)                                           | 0.78    | -5.77 (14.64,3.09)                 | 0.2     |
| Δ LDL-C (mg/dl)            | -3.2 (-12.6, 6.3)                      | 0.51    | -3.28 (-11.1,4.54)                 | 0.41    | -1.4 (-10.9, 8.04)                                         | 0.77    | -8.09 (-16.04,-0.15)               | 0.05    |
| Δ Total Cholesterol        | -7.0 (-17.5, 4.0)                      | 0.22    | -6.02(-15.1,3.06)                  | 0.19    | -1.5 (-12.3, 9.2)                                          | 0.78    | -8.81 (-18.04,0.42)                | 0.06    |
| Δ Triglycerides            | -10.0 (-37.3,17.4)                     | 0.47    | -11.65 (-31.99,8.69)               | 0.26    | 22.8 (-4.7, 50.2)                                          | 0.1     | 12.81 (-7.85,33.47)                | 0.22    |
| Δ HbA1C                    | 0.16 (-0.08, 0.4)                      | 0.2     | 0.19 (-0.05,0.42)                  | 0.11    | 0.19 (-0.05, 0.43)                                         | 0.13    | 0.16 (-0.07,0.4)                   | 0.17    |
| Δ Weight (kg)              | -0.37 (-1.9,1.2)                       | 0.64    | -0.45 (-2.02,1.12)                 | 0.57    | 0.08 (-1.5, 1.6)                                           | 0.92    | -0.17 (-1.74,1.4)                  | 0.83    |
| Δ BMI (kg/m <sup>2</sup> ) | -0.05 (-0.58, 0.49)                    | 0.86    | -0.06 (-0.6,0.48)                  | 0.83    | 0.03 (-0.5, 0.56)                                          | 0.9     | -0.03 (-0.57,0.5)                  | 0.91    |
| Δ SBP (mmHg)               | 0.81 (-4.7, 6.3)                       | 0.77    | -1.15 (-5.69,3.39)                 | 0.62    | -1.4 (-6.8, 4.0)                                           | 0.61    | -4.76 (-9.29,-0.24)                | 0.04    |
| Δ DBP (mmHg)               | 1.2 (-2.6, 4.9)                        | 0.54    | -0.45 (-3.35,2.46)                 | 0.76    | -1.4 (-5.04, 2.3)                                          | 0.46    | -2.53 (-5.42,0.36)                 | 0.19    |

HbA<sub>1c</sub>, Hemoglobin A1C; Non-High-density lipoprotein-calculated; LDL-C, Low-density lipoprotein- calculated; HDL, High-density lipoprotein; BMI, Body Mass Index; SBP, Systolic blood pressure; DBP, Diastolic blood pressure

**Supplemental Table III. Secondary Endpoints (Lifestyle Factors)-Between Group Comparisons**

| Outcomes                       | Prevention Consult Alone vs Usual Care |         |                                    |         | Prevention Consult + Behavioral Intervention vs Usual Care |         |                                    |         |
|--------------------------------|----------------------------------------|---------|------------------------------------|---------|------------------------------------------------------------|---------|------------------------------------|---------|
|                                | Unadjusted difference between groups   | P value | Adjusted difference between groups | P value | Unadjusted difference between groups                       | P value | Adjusted difference between groups | P value |
| Δ Quality of life              | -0.01 (-0.04,0.03)                     | 0.75    | 0.02 (-0.06, 0.01)                 | 0.22    | -0.01 (-0.04,0.03)                                         | 0.62    | -0.02 (-0.05,0.02)                 | 0.28    |
| Δ Yale physical activity       | -3.8 (-11.1, 3.54)                     | 0.31    | 0.28 (-7.4, 6.9)                   | 0.94    | -3.41 (-9.86,3.05)                                         | 0.3     | -2.36 (-8.71,3.99)                 | 0.47    |
| Δ Saturated fat intake         | 0.36 (-1.11, 1.83)                     | 0.63    | -0.63 (-2.1, 0.8)                  | 0.39    | -0.44 (-1.73,0.86)                                         | 0.51    | 0.51 (-1.77,0.76)                  | 0.43    |
| Δ Fruit & Vegetable Intake     | -0.04 (-0.54, 0.45)                    | 0.87    | 0.06 (-0.42, 0.55)                 | 0.8     | -0.15 (-0.6, 0.29)                                         | 0.5     | -0.05 (-0.05,0.39)                 | 0.81    |
| Δ Medication Adherence         | -0.15 (-0.43, 0.13)                    | 0.28    | -0.25 (-0.53, 0.02)                | 0.07    | -0.35 (-0.94, 0.25)                                        | 0.25    | 0.01 (-0.59, 0.6)                  | 0.98    |
| Δ Patient health questionnaire | 0.15 (-0.61, 0.91)                     | 0.7     | -0.19 (-0.94, 0.56)                | 0.63    | 0.29 (-0.34, 0.92)                                         | 0.37    | 0.07 (-0.56, 0.69)                 | 0.83    |

Quality of life measured by EQ5D survey; Physical Activity measured by Part 2 of Yale Physical Activity Questionnaire; Saturated fat measured by NWLRC Fat Intake Survey; fruit and vegetable intake measured by Fruit and Vegetable Intake Screener; medication adherence defined by Morisky Scale; patient health defined by Personal Health Assessment Questionnaire

**Supplemental Table IV. Differences in Baseline Characteristics in Patients with and without Follow-up Data at 6 months**

|                            | <b>With follow-up data</b> | <b>Missing follow-up data</b> | <b>P value</b> |
|----------------------------|----------------------------|-------------------------------|----------------|
|                            | N=317                      | N=80                          |                |
| <b>Age</b>                 | 65.16(10.35)               | 62.18(12.04)                  | 0.04           |
| <b>Female sex</b>          | 75(23.66%)                 | 19(23.75%)                    | 0.99           |
| <b>Race</b>                |                            |                               | 0.76           |
| White                      | 217(68.45%)                | 55(68.75%)                    |                |
| Black                      | 46(14.51%)                 | 10(12.5%)                     |                |
| Asian                      | 15(4.73%)                  | 6(7.5%)                       |                |
| Other                      | 39(12.3%)                  | 9(11.25%)                     |                |
| <b>Ethnicity</b>           |                            |                               | 0.20           |
| Hispanic                   | 30(9.46%)                  | 4(5%)                         |                |
| Non-Hispanic               | 287(90.54%)                | 76(95%)                       |                |
| <b>BMI</b>                 | 29.74(5.15)                | 29.5(4.92)                    | 0.70           |
| <b>Education</b>           |                            |                               | 0.02           |
| ≥ High school Education    | 301(97.41%)                | 71(91.03%)                    |                |
| < High School Education    | 8(2.59%)                   | 7(8.97%)                      |                |
| <b>Risk Factors</b>        |                            |                               |                |
| Current Smoker             | 36(11.36%)                 | 15(18.75%)                    | 0.08           |
| Hypertension               | 251(79.18%)                | 64(80%)                       | 0.87           |
| Hyperlipidemia             | 273(86.12%)                | 73(91.25%)                    | 0.22           |
| Diabetes                   | 95(29.97%)                 | 31(38.75%)                    | 0.13           |
| Family history(any)        | 138(43.81%)                | 30(37.5%)                     | 0.31           |
| Prior Angioplasty or Stent | 123(38.8%)                 | 31(38.75%)                    | 0.99           |
| Depression                 | 49(15.61%)                 | 9(12%)                        | 0.43           |
| Stress work/home           |                            |                               | 0.10           |
| At least some              | 236(75.16%)                | 50(65.79%)                    |                |
| Never                      | 78(24.84%)                 | 26(34.21%)                    |                |
| Financial Stress           |                            |                               | 0.53           |
| At least moderate          | 123(39.42%)                | 27(35.53%)                    |                |
| Little or None             | 189(60.58%)                | 49(64.47%)                    |                |
| <b>Medications</b>         |                            |                               |                |
| Aspirin                    | 247(77.92%)                | 72(90%)                       | 0.02           |

|                               |             |            |      |
|-------------------------------|-------------|------------|------|
| Clopidogrel                   | 116(36.59%) | 30(37.5%)  | 0.88 |
| ACE-inhibitors                | 85(26.81%)  | 22(27.5%)  | 0.90 |
| Angiotensin-receptor blockers | 87(27.44%)  | 22(27.5%)  | 0.99 |
| Any Statin                    | 217(68.45%) | 62(77.5%)  | 0.11 |
| High Intensity                | 81(25.55%)  | 22(27.5%)  | 0.72 |
| Ezetimibe                     | 17(5.36%)   | 4(5%)      | 1.00 |
| Fish oil                      | 39(12.3%)   | 12(15%)    | 0.52 |
| Fibrates                      | 20(6.31%)   | 1(1.25%)   | 0.09 |
| Metformin                     | 58(18.3%)   | 18(22.5%)  | 0.39 |
| PCI performed                 | 299(94.32%) | 77(96.25%) | 0.78 |

“Missing follow-up data” reflects subjects missing either baseline or 6 month data including 3 in PC and 1 in UC who died prior to 6 month follow-up.

**Supplemental Table V. Total Number of Patients Missing Data at 6 Months for each endpoint**

| Variable Name | Usual care |                        | Prevention Consult |                        | Total N | Total missing |
|---------------|------------|------------------------|--------------------|------------------------|---------|---------------|
|               | N          | Missing follow-up data | N                  | Missing follow-up data |         |               |
| Non-HDL       | 104        | 30                     | 213                | 50                     | 317     | 80            |
| LDL           | 102        | 32                     | 212                | 51                     | 314     | 83            |
| TC            | 104        | 30                     | 213                | 50                     | 317     | 80            |
| TG            | 104        | 30                     | 213                | 50                     | 317     | 80            |
| HbA1c         | 90         | 44                     | 192                | 71                     | 282     | 115           |
| Weight        | 99         | 35                     | 212                | 51                     | 311     | 86            |
| BMI           | 99         | 35                     | 212                | 51                     | 311     | 86            |
| SBP           | 102        | 32                     | 212                | 51                     | 314     | 83            |

|     |     |    |     |    |     |    |
|-----|-----|----|-----|----|-----|----|
| DBP | 102 | 32 | 212 | 51 | 314 | 83 |
|-----|-----|----|-----|----|-----|----|

N reflects the number of patients with data at both baseline and 6 month time point for each endpoint. "Missing follow-up data" reflects subjects missing either baseline or 6 month data including 3 in PC and 1 in UC who died prior to 6 month follow-up.
